# Supplementary material for: Management of Abdominal Paraganglioma: A Single Center’s Experience
Source: MDPI journal article supplement (doi:10.3390/medicina60040604), 2024-04-06
Supplement: s1 [file s1]

|                    | Surgery Age | Sex | Clinical Presentation                | Genetic Mutation | Metanephrine and catecholamines plasmatic and urinary | Imaging                                | Mass Size and localization                                  | Surgery                                         | FU                                |
|--------------------|-------------|-----|--------------------------------------|------------------|-------------------------------------------------------|----------------------------------------|-------------------------------------------------------------|-------------------------------------------------|-----------------------------------|
| <b>Patient n°1</b> | 32 yrs      | F   | Hypertension and migraine in MEN2B   | RET              | POSITIVE                                              | Enhanced CT<br>DOTATOC                 | 20 x 30 mm inter-aortocaval PGL                             | VLS mass excision                               | Died after 3 years for metastases |
| <b>Patient n°2</b> | 42 yrs      | M   | Hypertension resistant to medicament | /                | POSITIVE                                              | Enhanced CT<br>DOTATOC                 | 30 mm + 30 mm bilateral peri-caval PGL under the renal vein | Explorative laparotomy: cytoreductive surgery   | Died after 8 years for metastases |
| <b>Patient n°3</b> | 56 yrs      | M   | Abdominal Pain                       | /                | NEGATIVE                                              | US<br>Enhanced CT<br>MIBG              | 40x35x38 mm Zuckermandl organ                               | VLS mass excision                               | Negative after 10 yrs             |
| <b>Patient n°4</b> | 49 yrs      | M   | Hypertension                         | /                | POSITIVE                                              | Enhanced CT<br>DOTATOC                 | 20 x 20 left PHEO and 25x25 mm right retroperitoneal PGL    | PGL Laparotomic excision and left adrenalectomy | Negative after 10 yrs             |
| <b>Patient n°5</b> | 35 yrs      | F   | Familial screening                   | SDHD mutation    | NEGATIVE                                              | Enhanced CT<br>Enhanced MRI<br>DOTATOC | 30 mm abdominal PGL+ 20 mm neck PGL                         | VLS mass excision and cervicotomy               | Negative after 10 yrs             |
| <b>Patient n°6</b> | 44 yrs      | M   | VHL-syndrome                         | /                | POSITIVE                                              | Enhanced MRI<br>DOTATOC                | 27x23 mm para-aortic PGL                                    | VLS mass excision                               | Negative after 1 yrs              |
| <b>Patient n°7</b> | 56 yrs      | F   | Cancer FU                            | /                | POSITIVE                                              | Enhanced CT<br>Enhanced MRI<br>DOTATOC | 60 x 30 mm para-aortic PGL                                  | Laparotomic excision                            | Negative after 1 yrs              |
| <b>Patient n°8</b> | 30 yrs      | F   | VHL-syndrome                         | RET              | POSITIVE                                              | Enhanced CT<br>Enhanced MRI<br>DOTATOC | 50 x30 mm Peri-caval under left renal vein                  | Laparotomic excision                            | Negative after 5 yrs              |

|                     |        |   |                           |               |          |                                        |                                                          |                      |                        |
|---------------------|--------|---|---------------------------|---------------|----------|----------------------------------------|----------------------------------------------------------|----------------------|------------------------|
| <b>Patient n°9</b>  | 69 yrs | F | Hypertension and headache | /             | POSITIVE | Enhanced CT<br>Enhanced MRI<br>DOTATOC | 45 mm<br>Left Para-aortic abdominal PGL                  | Laparotomic excision | Negative after 5 yrs   |
| <b>Patient n°10</b> | 53 yrs | F | Abdominal Pain            | /             | NEGATIVE | Enhanced MRI<br>MIBG                   | 60 x 20 mm<br>Peri-caval PGL                             | Laparotomic excision | Negative after 3 yrs   |
| <b>Patient n°11</b> | 51 yrs | M | Familial screening        | SDHD mutation | POSITIVE | Enhanced MRI<br>DOTATOC                | 42x36x42 mm<br>Peri-caval above the right renal vein PGL | Laparotomic excision | Negative after 1 yrs   |
| <b>Patient n°12</b> | 46 yrs | F | Cancer FU                 | /             | NEGATIVE | Enhanced CT<br>DOTATOC                 | 50 mm retroperitoneal peri-adrenal PGL                   | Lombotomic Excision  | Negative after 1 yrs   |
| <b>Patient n°13</b> | 39 yrs | F | Abdominal pain            | /             | NEGATIVE | US<br>Enhanced MRI<br>DOTATOC          | 48 x 23<br>Zuckerkindl organ                             | Laparotomic excision | Negative after 8 years |

**Table S1: Clinical features and management of each patient included in the study.**
